# Supplementary material
Source: PubMed Central journal article supplement (PMC3830931)
Supplement: NIHMS523579-supplement-1_si_001.pdf [file NIHMS523579-supplement-1_si_001.pdf]

## Supporting Information

Contribution from The Department of Chemistry and Biochemistry,  
University of Notre Dame, Notre Dame, Indiana 46556,  
Key Laboratory of Organic Synthesis of Jiangsu Province,  
College of Chemistry, Chemical Engineering and Materials Science,  
Soochow University, Suzhou 215123, P.R. China,  
Advanced Photon Source, Argonne National Laboratory, Argonne, Illinois 60439  
and Department of Physics and Center for Interdisciplinary Research on Complex Systems,  
Northeastern University, Boston, Massachusetts 02115,

### Probing Heme Vibrational Anisotropy: An Imidazole Orientation Effect?

Qian Peng,<sup>1</sup> Ming Li,<sup>†</sup> Chuanjiang Hu,<sup>2,†</sup> Jeffrey W. Pavlik,<sup>†</sup> Allen G. Oliver,<sup>†</sup> E. Ercan Alp,<sup>3</sup>  
Michael Y. Hu,<sup>§</sup> Jiyong Zhao,<sup>§</sup> J. Timothy Sage,<sup>4,\*</sup> and W. Robert Scheidt<sup>†,1</sup>

June 24, 2013

---

<sup>1</sup>The University of Notre Dame

<sup>2</sup>Soochow University

<sup>3</sup>Advanced Photon Source, Argonne National Laboratory

<sup>4</sup>Northeastern University

<sup>†</sup>To whom correspondence should be addressed. E-mail WRS, [scheidt.1@nd.edu](mailto:scheidt.1@nd.edu); JTS, [jtsage@neu.edu](mailto:jtsage@neu.edu)

**Table S1.** Predicted frequencies and  $e_{Fe}^2$  values for [Fe(OEP)(2MeHIm)] with x and y along the Fe-Im directions.

| frequency | $e^2_x$ lmpara | $e^2_y$ lmperp | $e^2_z$ | $e^2_{xyz}$ |
|-----------|----------------|----------------|---------|-------------|
| 24.7      | 0.000          | 0.010          | 0.000   | 0.011       |
| 31.6      | 0.000          | 0.000          | 0.011   | 0.011       |
| 34.1      | 0.000          | 0.000          | 0.092   | 0.093       |
| 109.2     | 0.000          | 0.000          | 0.021   | 0.021       |
| 111.2     | 0.000          | 0.000          | 0.035   | 0.035       |
| 116.5     | 0.002          | 0.012          | 0.000   | 0.014       |
| 123.9     | 0.008          | 0.000          | 0.032   | 0.040       |
| 151.7     | 0.000          | 0.026          | 0.000   | 0.026       |
| 152.4     | 0.028          | 0.003          | 0.000   | 0.031       |
| 157.8     | 0.008          | 0.005          | 0.001   | 0.014       |
| 176.3     | 0.004          | 0.000          | 0.111   | 0.115       |
| 194.7     | 0.006          | 0.000          | 0.095   | 0.102       |
| 205.6     | 0.003          | 0.003          | 0.021   | 0.027       |
| 207.3     | 0.022          | 0.206          | 0.001   | 0.228       |
| 212.4     | 0.108          | 0.070          | 0.009   | 0.186       |
| 218.0     | 0.025          | 0.041          | 0.218   | 0.284       |
| 221.7     | 0.026          | 0.097          | 0.105   | 0.229       |
| 228.6     | 0.164          | 0.015          | 0.016   | 0.195       |
| 242.6     | 0.037          | 0.137          | 0.001   | 0.175       |
| 251.9     | 0.041          | 0.045          | 0.001   | 0.086       |
| 255.6     | 0.006          | 0.007          | 0.025   | 0.037       |
| 258.0     | 0.199          | 0.072          | 0.005   | 0.276       |
| 270.7     | 0.000          | 0.000          | 0.050   | 0.050       |
| 278.7     | 0.128          | 0.008          | 0.001   | 0.137       |
| 281.1     | 0.009          | 0.093          | 0.000   | 0.102       |
| 305.4     | 0.012          | 0.000          | 0.000   | 0.013       |
| 307.7     | 0.001          | 0.010          | 0.000   | 0.011       |
| 328.5     | 0.000          | 0.000          | 0.029   | 0.030       |
| 331.8     | 0.008          | 0.011          | 0.000   | 0.019       |
| 334.4     | 0.014          | 0.006          | 0.000   | 0.019       |

a. All predicted frequencies are expressed in  $\text{cm}^{-1}$

**Table S2.** Predicted frequencies and  $e_{Fe}^2$  values for [Fe(OEP)(2MeHIm)] with x and y along the Fe-N<sub>p</sub> directions.

| frequency | $e_x^2$ | $e_y^2$ | $e_z^2$ | $e_{xyz}^2$ |
|-----------|---------|---------|---------|-------------|
| 24.7      | 0.002   | 0.008   | 0.000   | 0.011       |
| 31.6      | 0.000   | 0.000   | 0.011   | 0.011       |
| 34.1      | 0.000   | 0.000   | 0.092   | 0.093       |
| 109.2     | 0.000   | 0.000   | 0.021   | 0.021       |
| 111.2     | 0.000   | 0.000   | 0.035   | 0.035       |
| 116.5     | 0.000   | 0.014   | 0.000   | 0.014       |
| 123.9     | 0.008   | 0.001   | 0.032   | 0.040       |
| 151.7     | 0.006   | 0.020   | 0.000   | 0.026       |
| 152.4     | 0.018   | 0.013   | 0.000   | 0.031       |
| 157.8     | 0.012   | 0.001   | 0.001   | 0.014       |
| 176.3     | 0.003   | 0.001   | 0.111   | 0.115       |
| 194.7     | 0.005   | 0.002   | 0.095   | 0.102       |
| 205.6     | 0.001   | 0.005   | 0.021   | 0.027       |
| 207.3     | 0.002   | 0.226   | 0.001   | 0.228       |
| 212.4     | 0.164   | 0.013   | 0.009   | 0.186       |
| 218.0     | 0.005   | 0.062   | 0.218   | 0.284       |
| 221.7     | 0.001   | 0.123   | 0.105   | 0.229       |
| 228.6     | 0.177   | 0.002   | 0.016   | 0.195       |
| 242.6     | 0.001   | 0.173   | 0.001   | 0.175       |
| 251.9     | 0.011   | 0.075   | 0.001   | 0.086       |
| 255.6     | 0.010   | 0.002   | 0.025   | 0.037       |
| 258.0     | 0.266   | 0.005   | 0.005   | 0.276       |
| 270.7     | 0.000   | 0.000   | 0.050   | 0.050       |
| 278.7     | 0.132   | 0.003   | 0.001   | 0.137       |
| 281.1     | 0.001   | 0.100   | 0.000   | 0.102       |
| 305.4     | 0.012   | 0.001   | 0.000   | 0.013       |
| 307.7     | 0.005   | 0.006   | 0.000   | 0.011       |
| 328.5     | 0.000   | 0.000   | 0.029   | 0.030       |
| 331.8     | 0.002   | 0.017   | 0.000   | 0.019       |
| 334.4     | 0.019   | 0.001   | 0.000   | 0.019       |

a. All predicted frequencies are expressed in cm<sup>-1</sup>

Table S3. Predicted frequencies and  $e^2_{\text{Fe}}$  values for [Fe(OEP)] with x and y along the Fe-Np directions.<sup>a</sup>

| frequency | $e^2_x$ | $e^2_y$ | $e^2_z$ | $e^2_{xyz}$ |
|-----------|---------|---------|---------|-------------|
| 42.9      | 0.000   | 0.000   | 0.154   | 0.154       |
| 59.4      | 0.000   | 0.007   | 0.000   | 0.007       |
| 62.3      | 0.007   | 0.000   | 0.000   | 0.007       |
| 73.8      | 0.000   | 0.005   | 0.000   | 0.005       |
| 74.0      | 0.000   | 0.000   | 0.016   | 0.016       |
| 74.1      | 0.006   | 0.000   | 0.000   | 0.006       |
| 91.5      | 0.005   | 0.000   | 0.000   | 0.005       |
| 91.6      | 0.000   | 0.006   | 0.000   | 0.006       |
| 111.4     | 0.000   | 0.000   | 0.004   | 0.004       |
| 144.6     | 0.000   | 0.000   | 0.328   | 0.328       |
| 163.0     | 0.030   | 0.000   | 0.000   | 0.030       |
| 163.4     | 0.000   | 0.029   | 0.000   | 0.029       |
| 203.2     | 0.000   | 0.000   | 0.031   | 0.031       |
| 231.6     | 0.037   | 0.000   | 0.000   | 0.037       |
| 234.6     | 0.000   | 0.030   | 0.000   | 0.030       |
| 234.9     | 0.000   | 0.000   | 0.205   | 0.205       |
| 239.2     | 0.057   | 0.000   | 0.000   | 0.057       |
| 239.6     | 0.000   | 0.062   | 0.000   | 0.062       |
| 266.3     | 0.000   | 0.000   | 0.011   | 0.011       |
| 288.4     | 0.000   | 0.000   | 0.068   | 0.068       |
| 310.7     | 0.225   | 0.000   | 0.000   | 0.225       |
| 311.2     | 0.000   | 0.186   | 0.000   | 0.186       |
| 341.4     | 0.255   | 0.000   | 0.000   | 0.255       |
| 343.7     | 0.000   | 0.275   | 0.000   | 0.275       |
| 346.5     | 0.000   | 0.000   | 0.002   | 0.002       |
| 350.6     | 0.000   | 0.000   | 0.078   | 0.078       |
| 352.3     | 0.225   | 0.000   | 0.000   | 0.225       |
| 352.7     | 0.000   | 0.247   | 0.000   | 0.247       |
| 470.4     | 0.000   | 0.001   | 0.000   | 0.001       |
| 493.0     | 0.000   | 0.000   | 0.003   | 0.003       |
| 511.5     | 0.024   | 0.000   | 0.000   | 0.024       |
| 512.9     | 0.000   | 0.024   | 0.000   | 0.024       |

a. All predicted frequencies are expressed in  $\text{cm}^{-1}$

**Table ??.** Cartesian coordinates for the optimized structures of [Fe(OEP)(2MeHIm)] and [Fe(OEP)].

| [Fe(OEP)(2-MeHIm)] BP86/TZVP/6-31G* |           |           |           | [Fe(OEP)] BP86/TZVP/6-31G* |           |           |           |
|-------------------------------------|-----------|-----------|-----------|----------------------------|-----------|-----------|-----------|
| Fe                                  | -0.014775 | 0.010579  | 0.230839  | Fe                         | -0.019229 | 0.017712  | -0.263696 |
| N                                   | 1.657119  | -1.211067 | -0.069261 | N                          | 1.657224  | -1.091260 | -0.287673 |
| N                                   | -1.233035 | -1.646274 | -0.119260 | N                          | -1.125303 | -1.654130 | -0.270810 |
| N                                   | -1.688727 | 1.237575  | -0.054797 | N                          | -1.695644 | 1.126810  | -0.244004 |
| N                                   | 1.203196  | 1.672089  | -0.084531 | N                          | 1.086895  | 1.689597  | -0.256129 |
| C                                   | 2.973321  | -0.807473 | -0.199404 | C                          | 2.956995  | -0.640033 | -0.286663 |
| C                                   | 1.665144  | -2.593075 | -0.120187 | C                          | 1.750309  | -2.463956 | -0.294580 |
| C                                   | -0.828043 | -2.966938 | -0.095029 | C                          | -0.671242 | -2.955215 | -0.280944 |
| C                                   | -2.615237 | -1.655503 | -0.153177 | C                          | -2.500292 | -1.745235 | -0.256018 |
| C                                   | -3.007168 | 0.835847  | -0.164434 | C                          | -2.995332 | 0.675470  | -0.232942 |
| C                                   | -1.697812 | 2.618901  | -0.081451 | C                          | -1.788649 | 2.499389  | -0.224814 |
| C                                   | 0.795850  | 2.992625  | -0.053520 | C                          | 0.632906  | 2.990599  | -0.236354 |
| C                                   | 2.584966  | 1.683794  | -0.141590 | C                          | 2.461966  | 1.780613  | -0.259029 |
| C                                   | 3.854551  | -1.973502 | -0.309439 | C                          | 3.895474  | -1.751520 | -0.297544 |
| C                                   | 3.038179  | -3.088441 | -0.253679 | C                          | 3.140315  | -2.892942 | -0.302355 |
| C                                   | -1.987412 | -3.847607 | -0.113902 | C                          | -1.778249 | -3.886780 | -0.275993 |
| C                                   | -3.107724 | -3.025984 | -0.153956 | C                          | -2.924600 | -3.128423 | -0.260198 |
| C                                   | -3.890023 | 2.004068  | -0.247940 | C                          | -3.933733 | 1.786850  | -0.210591 |
| C                                   | -3.072242 | 3.117030  | -0.192021 | C                          | -3.178574 | 2.928269  | -0.205354 |
| C                                   | 1.953674  | 3.874478  | -0.079868 | C                          | 1.739986  | 3.922071  | -0.230131 |
| C                                   | 3.075043  | 3.054751  | -0.139190 | C                          | 2.886349  | 3.163704  | -0.244177 |
| C                                   | 0.515199  | -3.393856 | -0.081469 | C                          | 0.667057  | -3.329280 | -0.286046 |
| H                                   | 0.676327  | -4.477369 | -0.084057 | H                          | 0.881842  | -4.391963 | -0.283022 |
| C                                   | -3.426275 | -0.502696 | -0.178133 | C                          | -3.367889 | -0.660013 | -0.232632 |
| H                                   | -4.507134 | -0.674192 | -0.227794 | H                          | -4.429802 | -0.877692 | -0.212621 |
| C                                   | -0.547517 | 3.418596  | -0.034328 | C                          | -0.705274 | 3.364546  | -0.215867 |
| H                                   | -0.708532 | 4.502027  | -0.024153 | H                          | -0.919849 | 4.426976  | -0.190643 |
| C                                   | 3.394926  | 0.530319  | -0.198624 | C                          | 3.329686  | 0.695270  | -0.267449 |
| H                                   | 4.474724  | 0.701358  | -0.269618 | H                          | 4.391799  | 0.912698  | -0.258412 |
| C                                   | 5.347805  | -1.918803 | -0.502498 | C                          | 5.393232  | -1.622309 | -0.329194 |
| H                                   | 5.798925  | -2.871184 | -0.163498 | H                          | 5.844499  | -2.539441 | 0.068738  |
| H                                   | 5.782506  | -1.131675 | 0.145315  | H                          | 5.712385  | -0.815920 | 0.344211  |
| C                                   | 5.771801  | -1.654734 | -1.966137 | C                          | 5.962338  | -1.357325 | -1.737332 |
| H                                   | 6.872308  | -1.607740 | -2.058222 | H                          | 7.054139  | -1.262340 | -1.705482 |
| H                                   | 5.353238  | -0.701274 | -2.333338 | H                          | 5.551713  | -0.435271 | -2.163069 |
| H                                   | 5.404082  | -2.455413 | -2.631719 | H                          | 5.711204  | -2.176003 | -2.420717 |
| C                                   | 3.430784  | -4.538604 | -0.368190 | C                          | 3.607272  | -4.321722 | -0.340014 |
| H                                   | 2.841699  | -5.144948 | 0.348314  | H                          | 2.983970  | -4.935497 | 0.323513  |
| H                                   | 4.489109  | -4.658925 | -0.066718 | H                          | 4.624268  | -4.381615 | 0.066634  |
| C                                   | 3.245220  | -5.120411 | -1.789228 | C                          | 3.598080  | -4.938963 | -1.752786 |
| H                                   | 3.532275  | -6.187307 | -1.821226 | H                          | 3.936890  | -5.981342 | -1.725665 |
| H                                   | 3.865778  | -4.574352 | -2.521213 | H                          | 4.259452  | -4.383012 | -2.426415 |
| H                                   | 2.194499  | -5.034974 | -2.117310 | H                          | 2.592589  | -4.918024 | -2.187125 |
| C                                   | -1.941721 | -5.354053 | -0.118871 | C                          | -1.655761 | -5.385348 | -0.312761 |
| H                                   | -2.893012 | -5.751961 | 0.283882  | H                          | -2.562871 | -5.833817 | 0.110494  |
| H                                   | -1.151118 | -5.707377 | 0.571935  | H                          | -0.832049 | -5.708127 | 0.337119  |
| C                                   | -1.696029 | -5.965013 | -1.518344 | C                          | -1.432379 | -5.953246 | -1.728534 |
| H                                   | -1.662263 | -7.068704 | -1.467961 | H                          | -1.342681 | -7.045569 | -1.700881 |
| H                                   | -0.740944 | -5.610018 | -1.943980 | H                          | -0.519670 | -5.546750 | -2.177667 |
| H                                   | -2.497986 | -5.677136 | -2.220624 | H                          | -2.267482 | -5.696662 | -2.389617 |
| C                                   | -4.556674 | -3.435453 | -0.216216 | C                          | -4.352116 | -3.601615 | -0.275146 |
| H                                   | -5.166495 | -2.754529 | 0.409451  | H                          | -4.959386 | -2.975755 | 0.391559  |
| H                                   | -4.674546 | -4.441036 | 0.231725  | H                          | -4.402547 | -4.615647 | 0.140046  |
| C                                   | -5.136107 | -3.454924 | -1.650021 | C                          | -4.987807 | -3.605367 | -1.679698 |
| H                                   | -6.201405 | -3.749787 | -1.642675 | H                          | -6.027647 | -3.950101 | -1.636338 |
| H                                   | -4.586056 | -4.169504 | -2.287377 | H                          | -4.437341 | -4.267699 | -2.356863 |
| H                                   | -5.056784 | -2.460552 | -2.123682 | H                          | -4.978504 | -2.602368 | -2.120106 |
| C                                   | -5.386120 | 1.951792  | -0.416990 | C                          | -5.431803 | 1.658035  | -0.223580 |
| H                                   | -5.809952 | 1.155462  | 0.226664  | H                          | -5.741590 | 0.839597  | 0.439587  |
| H                                   | -5.831170 | 2.899111  | -0.056558 | H                          | -5.877339 | 2.567787  | 0.197099  |
| C                                   | -5.834525 | 1.709195  | -1.877050 | C                          | -6.020613 | 1.418408  | -1.628156 |

Table ?. Continued.

|    |              |           |           |    |              |          |           |
|----|--------------|-----------|-----------|----|--------------|----------|-----------|
| H  | -6.936485    | 1.665169  | -1.951690 | H  | -7.111871    | 1.322715 | -1.582727 |
| H  | -5.423994    | 0.760361  | -2.264886 | H  | -5.616101    | 0.504243 | -2.076172 |
| H  | -5.476442    | 2.518840  | -2.537049 | H  | -5.778984    | 2.249317 | -2.300111 |
| C  | -3.464976    | 4.568925  | -0.278040 | C  | -3.645828    | 4.357439 | -0.210626 |
| H  | -2.869509    | 5.162023  | 0.444189  | H  | -3.013186    | 4.959200 | 0.455063  |
| H  | -4.520521    | 4.684479  | 0.034625  | H  | -4.657003    | 4.409849 | 0.211283  |
| C  | -3.291396    | 5.175291  | -1.690305 | C  | -3.656411    | 5.000109 | -1.612004 |
| H  | -3.579697    | 6.242273  | -1.701466 | H  | -3.994670    | 6.041786 | -1.561293 |
| H  | -3.917391    | 4.641330  | -2.426625 | H  | -4.327260    | 4.456338 | -2.286205 |
| H  | -2.243322    | 5.097011  | -2.028739 | H  | -2.657129    | 4.987148 | -2.060747 |
| C  | 1.906560     | 5.380933  | -0.074172 | C  | 1.617182     | 5.421043 | -0.238067 |
| H  | 2.861162     | 5.776705  | 0.322958  | H  | 2.530186     | 5.861898 | 0.180490  |
| H  | 1.121858     | 5.728524  | 0.626096  | H  | 0.802693     | 5.731909 | 0.429017  |
| C  | 1.648144     | 6.001729  | -1.466946 | C  | 1.374067     | 6.014430 | -1.640068 |
| H  | 1.614595     | 7.104990  | -1.408219 | H  | 1.284901     | 7.106062 | -1.591408 |
| H  | 0.689314     | 5.649571  | -1.886384 | H  | 0.455106     | 5.616006 | -2.083652 |
| H  | 2.443752     | 5.719158  | -2.178522 | H  | 2.199797     | 5.769954 | -2.317316 |
| C  | 4.522528     | 3.467159  | -0.216988 | C  | 4.313575     | 3.637266 | -0.270642 |
| H  | 5.142020     | 2.779632  | 0.391854  | H  | 4.930064     | 2.999579 | 0.376097  |
| H  | 4.645340     | 4.467537  | 0.241291  | H  | 4.369958     | 4.643667 | 0.161987  |
| C  | 5.082404     | 3.504471  | -1.658177 | C  | 4.929484     | 3.666385 | -1.683686 |
| H  | 6.147345     | 3.800687  | -1.661716 | H  | 5.969875     | 4.010408 | -1.648727 |
| H  | 4.522901     | 4.225807  | -2.279443 | H  | 4.369651     | 4.340737 | -2.341017 |
| H  | 4.997855     | 2.515627  | -2.142388 | H  | 4.913867     | 2.671479 | -2.141912 |
| N  | -0.178410    | 0.007703  | 2.404386  | E= | -2881.237418 | Hartree  |           |
| C  | 0.739925     | -0.222130 | 3.353279  |    |              |          |           |
| N  | 0.140322     | -0.166805 | 4.584712  |    |              |          |           |
| H  | 0.617427     | -0.302982 | 5.474029  |    |              |          |           |
| C  | -1.211577    | 0.104492  | 4.415198  |    |              |          |           |
| H  | -1.894384    | 0.199882  | 5.256264  |    |              |          |           |
| C  | -1.388189    | 0.211483  | 3.054325  |    |              |          |           |
| H  | -2.293870    | 0.421779  | 2.489243  |    |              |          |           |
| C  | 2.193088     | -0.513842 | 3.159383  |    |              |          |           |
| H  | 2.343442     | -1.522700 | 2.736697  |    |              |          |           |
| H  | 2.737185     | -0.449828 | 4.117691  |    |              |          |           |
| H  | 2.640205     | 0.201488  | 2.450045  |    |              |          |           |
| E= | -3146.918137 | Hartree   |           |    |              |          |           |

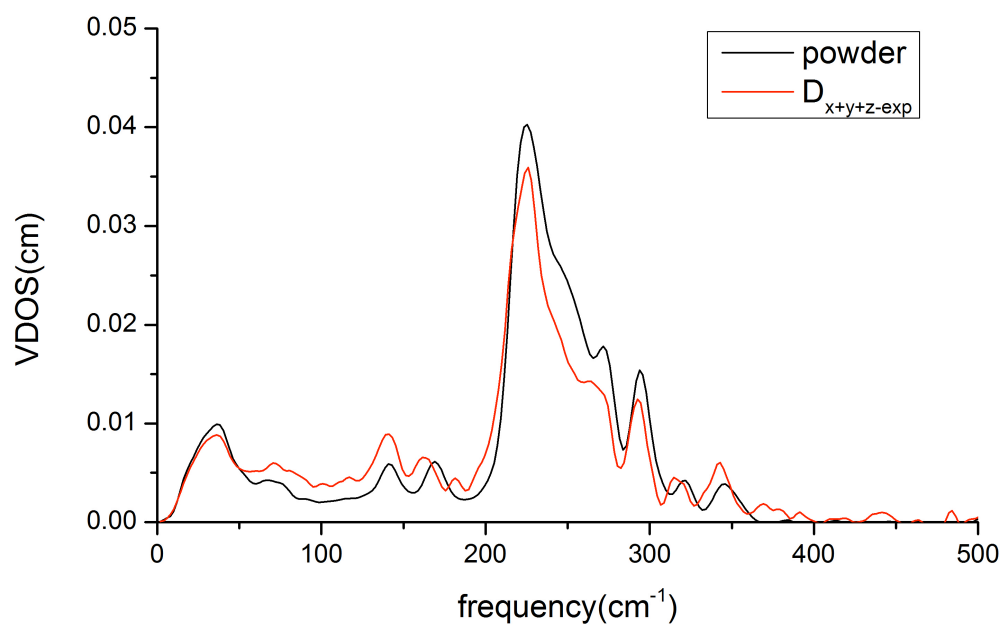

**Figure S1.** Figure showing a comparison of the experimental powder spectrum with the sum of the measured oriented crystal spectra in the three orthogonal directions.

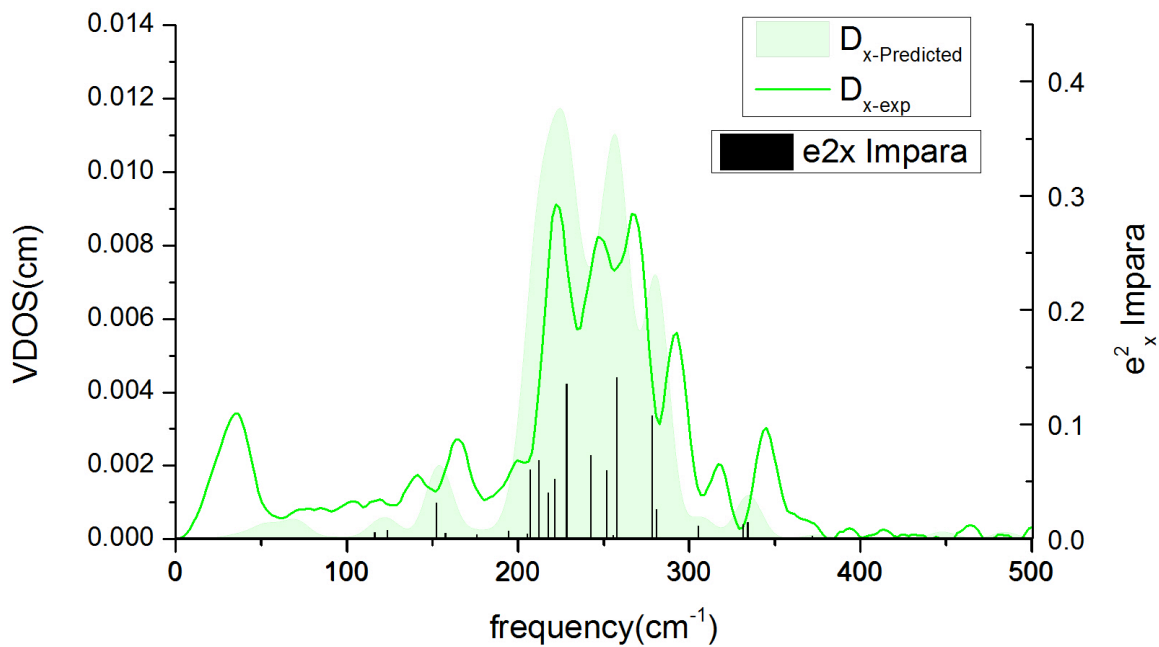

**Figure S2.** Figure showing a comparison of the in-plane experimental NRVS spectrum taken parallel to the 2-methylimidazole plane vs. the BP86 predicted spectrum. The predicted spectrum has been obtained by convolving the predicted  $e^2$  values with a Gaussian with a FWHH of  $15 \text{ cm}^{-1}$ .



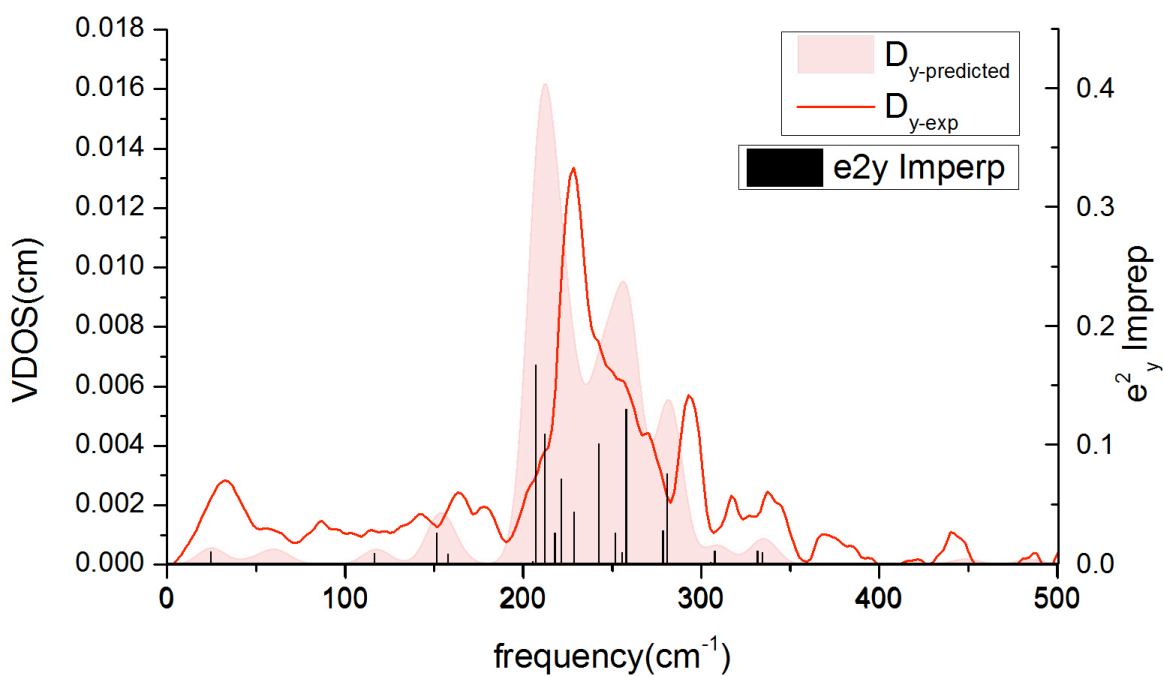

**Figure S3.** Figure showing a comparison of the in-plane experimental NRVS spectrum taken perpendicular to the 2-methylimidazole plane vs. the BP86 predicted spectrum. The predicted spectrum has been obtained by convolving the predicted  $e^2$  values with a Gaussian with a FWHH of  $15 \text{ cm}^{-1}$ .

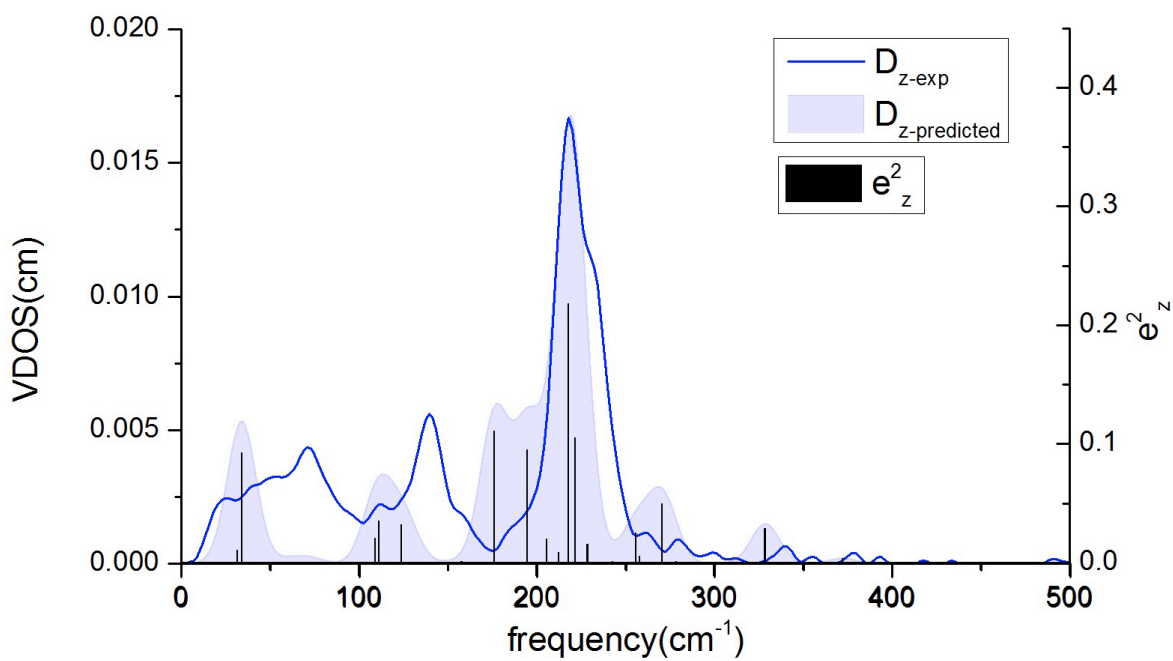

**Figure S4.** Figure showing a comparison of the out-of-plane experimental NRVS spectrum taken perpendicular to the porphyrin plane vs. the BP86 predicted spectrum. The predicted spectrum has been obtained by convolving the predicted  $e^2$  values with a Gaussian with a FWHH of  $15 \text{ cm}^{-1}$ .

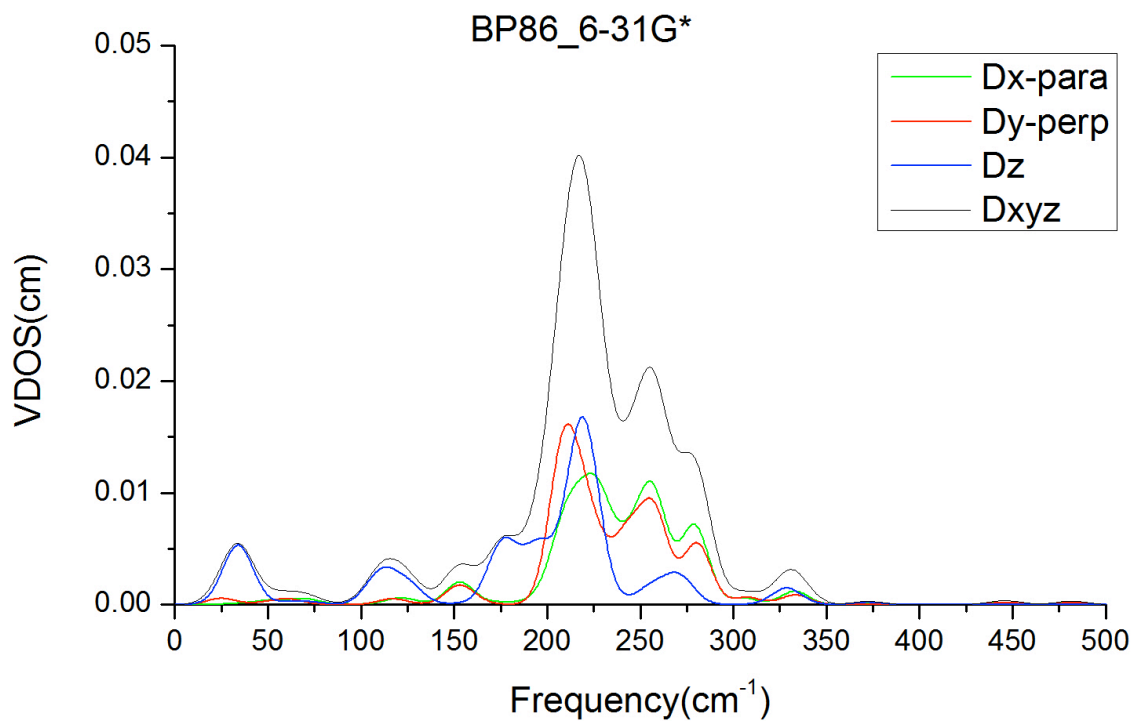

**Figure S5.** Figure showing predicted NRVS spectra for [Fe(OEP)(2-MeHIm)] based on calculations utilizing the BP86 functional with the basis set TZVP for iron and 6-31G\* for all other atoms. The spectra are shown for the coordinate system used to obtain the experimental data and which can be compared with the experimental data of Figure S1. The illustrated spectra has been obtained by convolving the predicted  $e^2$  values with a Gaussian with a FWHH of  $15 \text{ cm}^{-1}$ .

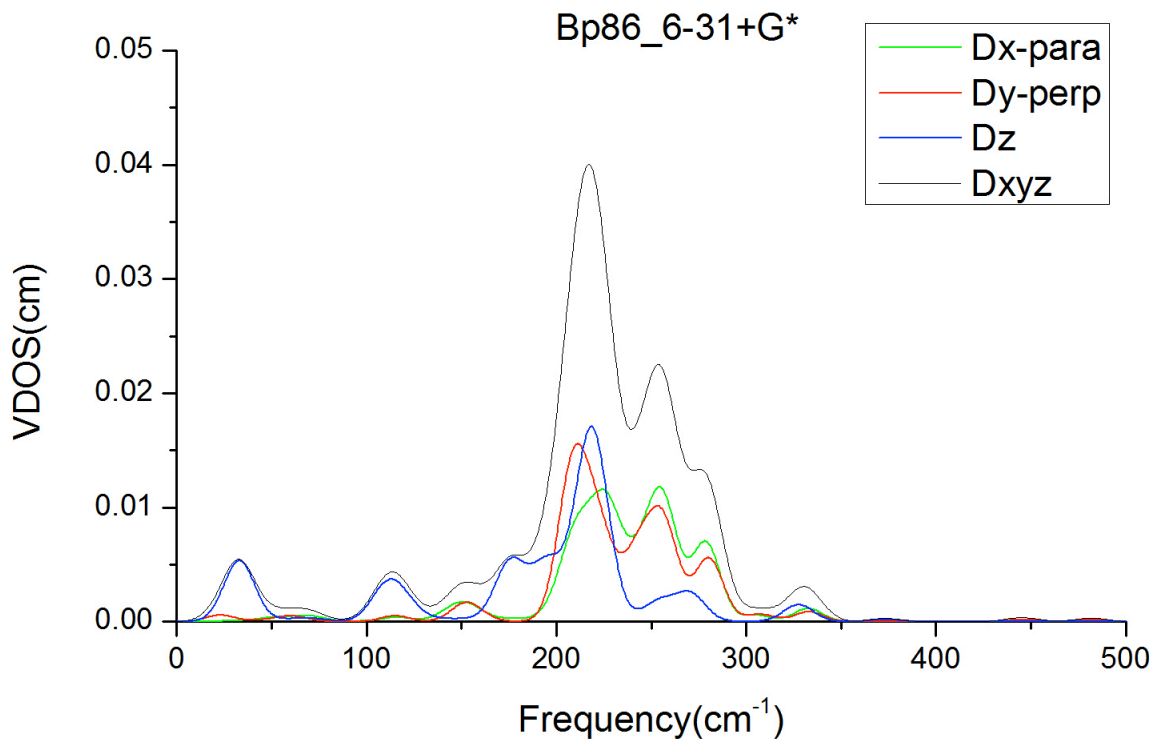

**Figure S6.** Figure showing predicted NRVS spectra for [Fe(OEP)(2-MeHIm)] based on calculations utilizing the BP86 functional with the basis set TZVP for iron, 6-31+G\* for the nitrogen atoms of the molecule and 6-31G\* for all other atoms. The spectra are shown for the coordinate system used to obtain the experimental data and which can be compared with the experimental data of Figure S1. The illustrated spectra has been obtained by convolving the predicted  $e^2$  values with a Gaussian with a FWHH of  $15 \text{ cm}^{-1}$ .

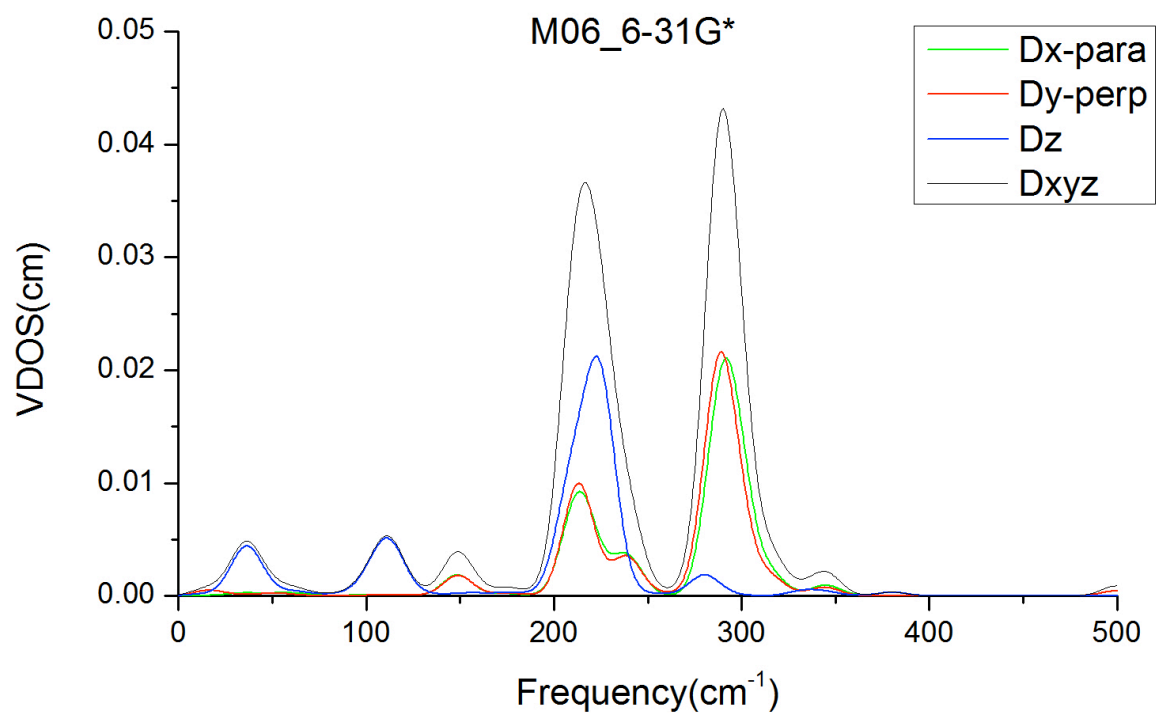

**Figure S7.** Figure showing predicted NRVS spectra for [Fe(OEP)(2-MeHIm)] based on calculations utilizing the M06 functional with the basis set TZVP for iron and 6-31G\* for all other atoms. The spectra are shown for the coordinate system used to obtain the experimental data and which can be compared with the experimental data of Figure S1. The illustrated spectra has been obtained by convolving the predicted  $e^2$  values with a Gaussian with a FWHH of  $15 \text{ cm}^{-1}$ .

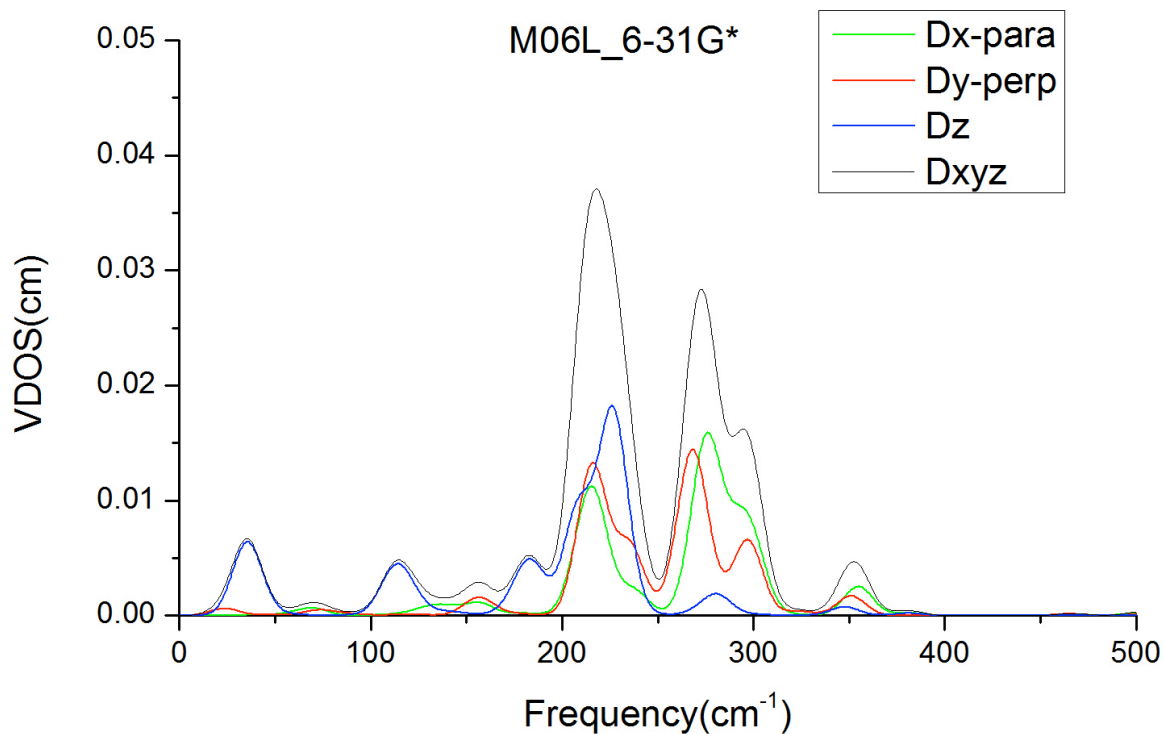

**Figure S8.** Figure showing predicted NRVS spectra for  $[\text{Fe}(\text{OEP})(2\text{-MeHIm})]$  based on calculations utilizing the M06L functional with the basis set TZVP for iron and 6-31G\* for all other atoms. The spectra are shown for the coordinate system used to obtain the experimental data and which can be compared with the experimental data of Figure S1. The illustrated spectra has been obtained by convolving the predicted  $e^2$  values with a Gaussian with a FWHH of  $15 \text{ cm}^{-1}$ .

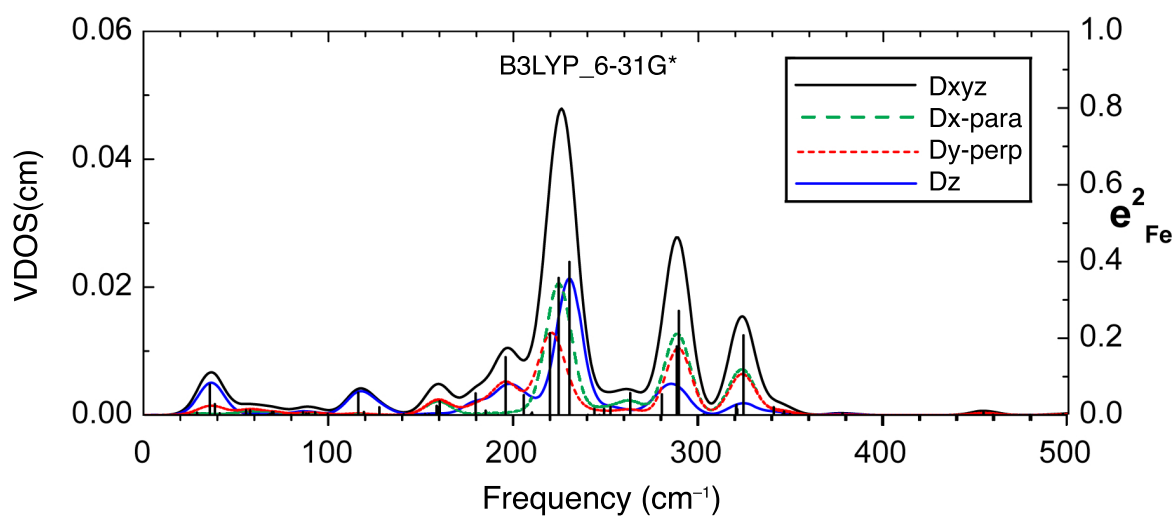

**Figure S9.** Figure showing predicted NRVS spectra for [Fe(OEP)(2-MeHIm)] based on calculations utilizing the B3LYP functional with the basis set TZVP for iron and 6-31G\* for all other atoms. The spectra are shown for the coordinate system used to obtain the experimental data and which can be compared with the experimental data of Figure S1. The illustrated spectra has been obtained by convolving the predicted  $e^2$  values with a Gaussian with a FWHH of 15  $\text{cm}^{-1}$ .

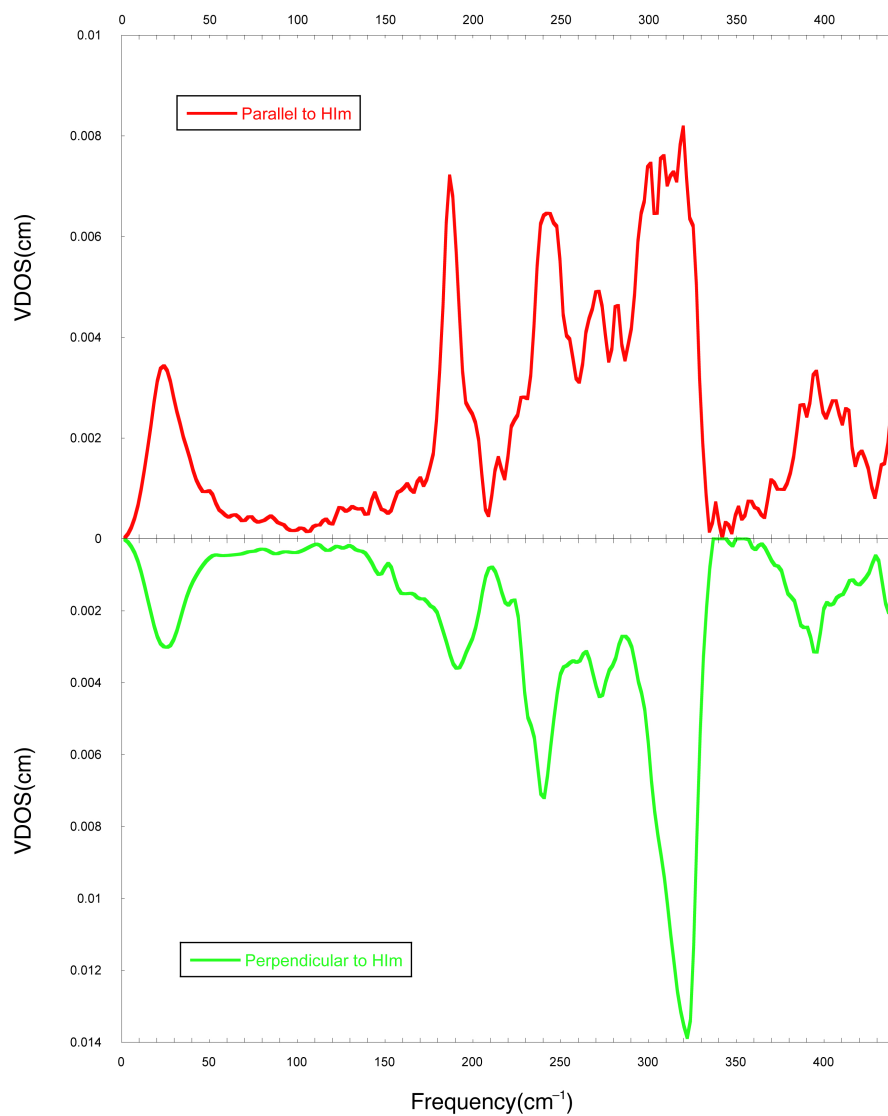

**Figure S10.** Figure showing the asymmetry in the in-plane vibrational spectrum for  $\text{Fe}(\text{TpivPP})(2\text{-MeHIm})$ . Spectra were taken with the exciting X-ray beam parallel and perpendicular to the axial 2-methylimidazole plane.
